# Supplementary material for: Adding Time-Domain 161Dy Mössbauer to the Mix: a Multitechnique Investigation of Magnetic Transitions in a {CoIII3DyIII3} Cluster with a Toroidal Moment
Source: Research Square preprint supplement (doi:10.21203/rs.3.rs-7102700/v1), 2025-07-21

## checkCIF/PLATON report

You have not supplied any structure factors. As a result the full set of tests cannot be run.

THIS REPORT IS FOR GUIDANCE ONLY. IF USED AS PART OF A REVIEW PROCEDURE FOR PUBLICATION, IT SHOULD NOT REPLACE THE EXPERTISE OF AN EXPERIENCED CRYSTALLOGRAPHIC REFEREE.

No syntax errors found.      CIF dictionary      Interpreting this report

### Datablock: yp-cody

---

|                        |                                                      |                                                 |                             |
|------------------------|------------------------------------------------------|-------------------------------------------------|-----------------------------|
| Bond precision:        | C-C = 0.0109 Å                                       | Wavelength=0.71073                              |                             |
| Cell:                  | a=18.8802 (6)<br>alpha=90                            | b=18.8802 (6)<br>beta=90                        | c=35.8782 (15)<br>gamma=120 |
| Temperature:           | 180 K                                                |                                                 |                             |
|                        | Calculated                                           | Reported                                        |                             |
| Volume                 | 11075.8 (8)                                          | 11075.8 (8)                                     |                             |
| Space group            | P -3 c 1                                             | P -3 c 1                                        |                             |
| Hall group             | -P 3 2 "c                                            | -P 3 2 "c                                       |                             |
| Moiety formula         | C78 H94 Co3 Dy3 N6 O25,<br>9 (C2 H3 N), C2 N, 2 (Cl) | C78 H94 Co3 Dy3 N6 O25,<br>2 (Cl), 10 (C2 H3 N) |                             |
| Sum formula            | C98 H121 Cl2 Co3 Dy3 N16<br>O25                      | C98 H124 Cl2 Co3 Dy3 N16<br>O25                 |                             |
| Mr                     | 2658.29                                              | 2661.31                                         |                             |
| Dx, g cm <sup>-3</sup> | 1.594                                                | 1.596                                           |                             |
| Z                      | 4                                                    | 4                                               |                             |
| Mu (mm <sup>-1</sup> ) | 2.561                                                | 2.561                                           |                             |
| F000                   | 5336.0                                               | 5348.0                                          |                             |
| F000'                  | 5341.01                                              |                                                 |                             |
| h, k, lmax             | 23, 23, 43                                           | 23, 23, 43                                      |                             |
| Nref                   | 7019                                                 | 7016                                            |                             |
| Tmin, Tmax             | 0.530, 0.631                                         | 0.506, 0.581                                    |                             |
| Tmin'                  | 0.471                                                |                                                 |                             |
| Correction method=     | # Reported T Limits: Tmin=0.506 Tmax=0.581           |                                                 |                             |
| AbsCorr =              | MULTI-SCAN                                           |                                                 |                             |
| Data completeness=     | 1.000                                                | Theta (max)= 25.674                             |                             |

R(reflections)= 0.0367( 4049)

wR2(reflections)=  
0.0797( 7016)

S = 0.825

Npar= 459

---

The following ALERTS were generated. Each ALERT has the format

**test-name\_ALERT\_alert-type\_alert-level.**

Click on the hyperlinks for more details of the test.

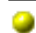

#### Alert level C

PLAT041\_ALERT\_1\_C Calc. and Reported SumFormula Strings Differ Please Check  
Calc: C98 H121 Cl2 Co3 Dy3 N16 O25  
Rep.: C98 H124 Cl2 Co3 Dy3 N16 O25

**Author Response: The methyl H-atoms on some of the lattice MeCN could not be modelled, but are included in the sum formula in the cif**

PLAT042\_ALERT\_1\_C Calc. and Reported MoietyFormula Strings Differ Please Check  
Calc: C78 H94 Co3 Dy3 N6 O25, 9(C2 H3 N), C2 N, 2(Cl  
)  
Rep.: C78 H94 Co3 Dy3 N6 O25, 2(Cl), 10(C2 H3 N)

**Author Response: The methyl H-atoms on some of the lattice MeCN could not be modelled, but are included in the sum formula in the cif**

PLAT043\_ALERT\_1\_C Calculated and Reported Mol. Weight Differ by .. 3.02 Check

**Author Response: The methyl H-atoms on some of the lattice MeCN could not be modelled, but are included in the sum formula in the cif**

PLAT068\_ALERT\_1\_C Reported F000 Differs from Calcd (or Missing)... Please Check

**Author Response: The methyl H-atoms on some of the lattice MeCN could not be modelled, but are included in the sum formula in the cif**

PLAT244\_ALERT\_4\_C Low 'Solvent' Ueq as Compared to Neighbors of C31 Check  
PLAT244\_ALERT\_4\_C Low 'Solvent' Ueq as Compared to Neighbors of C33 Check  
PLAT260\_ALERT\_2\_C Large Average Ueq of Residue Including N31 0.147 Check  
PLAT260\_ALERT\_2\_C Large Average Ueq of Residue Including N32 0.121 Check  
PLAT342\_ALERT\_3\_C Low Bond Precision on C-C Bonds ..... 0.01092 Ang.  
PLAT601\_ALERT\_2\_C Unit Cell Contains Solvent Accessible VOIDS <= 36 Ang\*\*3

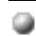

#### Alert level G

FORMU01\_ALERT\_2\_G There is a discrepancy between the atom counts in the  
\_chemical\_formula\_sum and the formula from the \_atom\_site\* data.  
Atom count from \_chemical\_formula\_sum: C98 H124 Cl2 Co3 Dy3 N16 O25  
Atom count from the \_atom\_site data: C98.00480 H121 Cl2.004900 Co3 Dy

CELLZ01\_ALERT\_1\_G Difference between formula and atom\_site contents detected.  
 CELLZ01\_ALERT\_1\_G WARNING: H atoms missing from atom site list. Is this intentional?  
 From the CIF: \_cell\_formula\_units\_Z 4  
 From the CIF: \_chemical\_formula\_sum C98 H124 Cl2 Co3 Dy3 N16 O25  
 TEST: Compare cell contents of formula and atom\_site data

| atom | Z*formula | cif sites | diff  |
|------|-----------|-----------|-------|
| C    | 392.00    | 392.00    | 0.00  |
| H    | 496.00    | 484.00    | 12.00 |
| Cl   | 8.00      | 8.00      | 0.00  |
| Co   | 12.00     | 12.00     | 0.00  |
| Dy   | 12.00     | 12.00     | 0.00  |
| N    | 64.00     | 64.00     | 0.00  |
| O    | 100.00    | 100.00    | -0.00 |

|                   |                                                  |        |        |
|-------------------|--------------------------------------------------|--------|--------|
| PLAT002_ALERT_2_G | Number of Distance or Angle Restraints on AtSite | 16     | Note   |
| PLAT003_ALERT_2_G | Number of Uiso or U(i,j) Restrained non-H-Atoms  | 4      | Report |
| PLAT172_ALERT_4_G | The CIF-Embedded .res File Contains DFIX Records | 4      | Report |
| PLAT178_ALERT_4_G | The CIF-Embedded .res File Contains SIMU Records | 1      | Report |
| PLAT188_ALERT_3_G | A Non-default SIMU Restraint Value has been used | 0.0200 | Report |
| PLAT299_ALERT_4_G | Atom Site Occupancy Constrained at .....         | 0.5    | Check  |
|                   | N33A C35A C36A H36A H36B H36C N33B C35B          |        |        |
|                   | C36B H36D H36E H36F                              |        |        |
| PLAT300_ALERT_4_G | Atom Site Occupancy of N41 Constrained at        | 0.3333 | Check  |
| PLAT300_ALERT_4_G | Atom Site Occupancy of C41 Constrained at        | 0.3333 | Check  |
| PLAT300_ALERT_4_G | Atom Site Occupancy of C42 Constrained at        | 0.3333 | Check  |
| PLAT300_ALERT_4_G | Atom Site Occupancy of Cl2 Constrained at        | 0.3333 | Check  |
| PLAT302_ALERT_4_G | Anion/Solvent/Minor-Residue Disorder (Resd 4)    | 100%   | Note   |
| PLAT302_ALERT_4_G | Anion/Solvent/Minor-Residue Disorder (Resd 5)    | 100%   | Note   |
| PLAT302_ALERT_4_G | Anion/Solvent/Minor-Residue Disorder (Resd 6)    | 100%   | Note   |
| PLAT302_ALERT_4_G | Anion/Solvent/Minor-Residue Disorder (Resd 8)    | 100%   | Note   |
| PLAT304_ALERT_4_G | Non-Integer Number of Atoms in ..... (Resd 7)    | 0.33   | Check  |
| PLAT304_ALERT_4_G | Non-Integer Number of Atoms in ..... (Resd 8)    | 0.33   | Check  |
| PLAT315_ALERT_2_G | Singly Bonded Carbon Detected (H-atoms Missing). | C42    | Check  |
| PLAT413_ALERT_2_G | Short Inter XH3 .. XHn H14 ..H36B .              | 2.10   | Ang.   |
|                   | y,1-x+y,1-z =                                    | 8_566  | Check  |
| PLAT413_ALERT_2_G | Short Inter XH3 .. XHn H18A ..H36F .             | 1.92   | Ang.   |
|                   | y,1-x+y,1-z =                                    | 8_566  | Check  |
| PLAT480_ALERT_4_G | Long H...A H-Bond Reported H34A ..N32 .          | 2.65   | Ang.   |
| PLAT789_ALERT_4_G | Atoms with Negative _atom_site_disorder_group #  | 3      | Check  |
| PLAT794_ALERT_5_G | Tentative Bond Valency for Dy1 (III) .           | 2.96   | Info   |
| PLAT794_ALERT_5_G | Tentative Bond Valency for Cl (III) .            | 3.27   | Info   |
| PLAT822_ALERT_4_G | CIF-embedded .res Contains Negative PART Numbers | 1      | Check  |
| PLAT860_ALERT_3_G | Number of Least-Squares Restraints .....         | 16     | Note   |
| PLAT933_ALERT_2_G | Number of HKL-OMIT Records in Embedded .res File | 2      | Note   |
|                   | -1 2 0, 0 1 0,                                   |        |        |

- 
- 0 **ALERT level A** = Most likely a serious problem - resolve or explain  
 0 **ALERT level B** = A potentially serious problem, consider carefully  
 10 **ALERT level C** = Check. Ensure it is not caused by an omission or oversight  
 29 **ALERT level G** = General information/check it is not something unexpected
- 6 ALERT type 1 CIF construction/syntax error, inconsistent or missing data  
 10 ALERT type 2 Indicator that the structure model may be wrong or deficient  
 3 ALERT type 3 Indicator that the structure quality may be low  
 18 ALERT type 4 Improvement, methodology, query or suggestion  
 2 ALERT type 5 Informative message, check

---

---

It is advisable to attempt to resolve as many as possible of the alerts in all categories. Often the minor alerts point to easily fixed oversights, errors and omissions in your CIF or refinement strategy, so attention to these fine details can be worthwhile. In order to resolve some of the more serious problems it may be necessary to carry out additional measurements or structure refinements. However, the purpose of your study may justify the reported deviations and the more serious of these should normally be commented upon in the discussion or experimental section of a paper or in the "special\_details" fields of the CIF. checkCIF was carefully designed to identify outliers and unusual parameters, but every test has its limitations and alerts that are not important in a particular case may appear. Conversely, the absence of alerts does not guarantee there are no aspects of the results needing attention. It is up to the individual to critically assess their own results and, if necessary, seek expert advice.

### **Publication of your CIF in IUCr journals**

A basic structural check has been run on your CIF. These basic checks will be run on all CIFs submitted for publication in IUCr journals (*Acta Crystallographica*, *Journal of Applied Crystallography*, *Journal of Synchrotron Radiation*); however, if you intend to submit to *Acta Crystallographica Section C* or *E* or *IUCrData*, you should make sure that full publication checks are run on the final version of your CIF prior to submission.

### **Publication of your CIF in other journals**

Please refer to the *Notes for Authors* of the relevant journal for any special instructions relating to CIF submission.

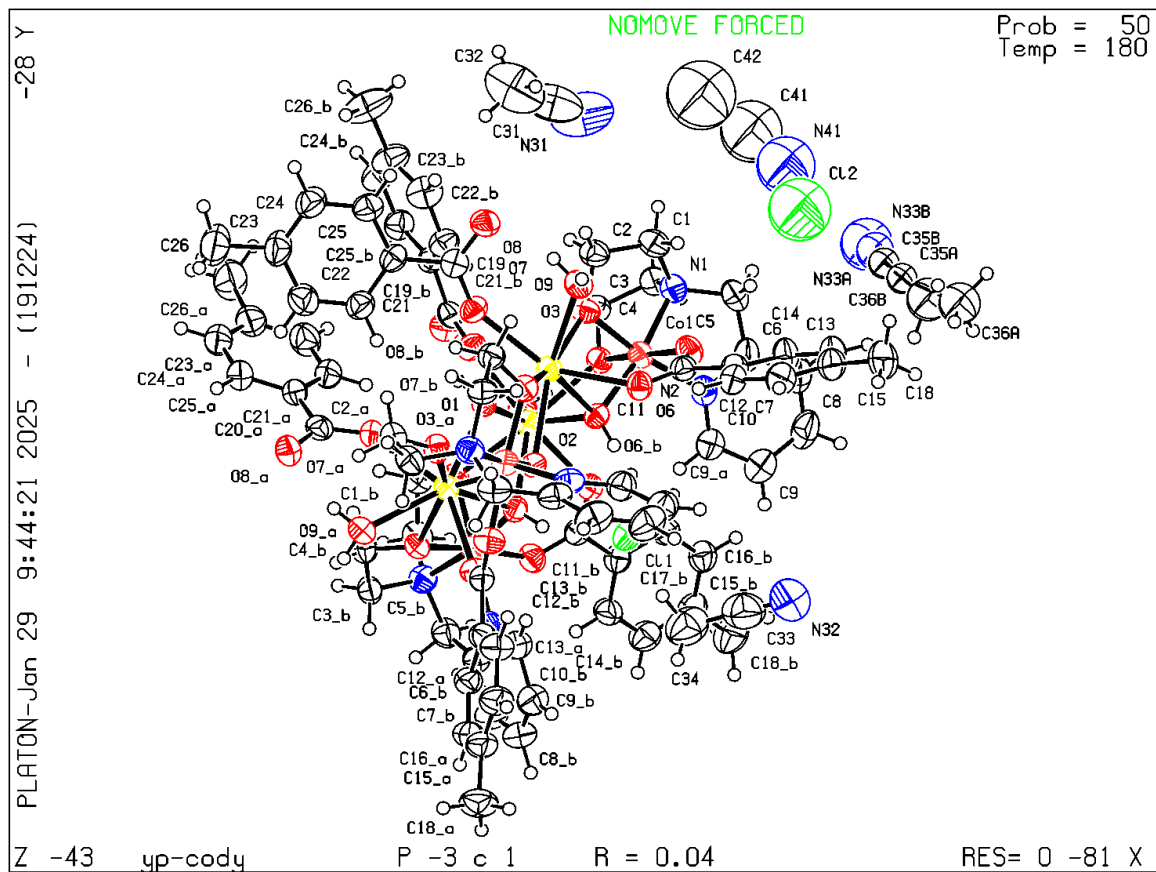

Supplement: Supplementary file 1 [file 74cbccf05f4e2c1ee7eac649.pdf]
